# Supplementary material for: Relationship between Dietary Patterns and Cardiovascular Disease Risk in Korean Older Adults
Source: PubMed Central journal article supplement (PMC8038041; doi:10.3390/ijerph18073703), 2021-04-01
Supplement: ijerph-18-03703-s001.pdf [file ijerph-18-03703-s001.pdf]

**Table S1.** Food groups and items used in the dietary pattern analysis.

| <b>Food Group</b>                   | <b>Food Items</b>                                                                             |
|-------------------------------------|-----------------------------------------------------------------------------------------------|
| White rice                          | White rice                                                                                    |
| Other grain                         | Brown rice, barley, millet, maize, etc.                                                       |
| Noodles and dumpling                | Noodle, ramen, somyon, udong, dumpling, etc.                                                  |
| Flour and bread                     | Wheat flour, breads, doughnuts, cakes, etc.                                                   |
| Pizza, hamburger, cereals and snack | Pizza, hamburger, sandwich, cereal, cracker, snack, cookie, popcorn, biscuits, chip, etc.     |
| Potatoes                            | Potato, french fried potato, sweet potato, etc.                                               |
| Sugars and sweets                   | White sugar, honey, candy, chocolates, jelly, caramel, etc.                                   |
| Legumes                             | Soybean, curd, green peas, red bean, etc.                                                     |
| Nuts and seeds                      | Peanuts, almonds, walnut, sunflower seed, etc.                                                |
| Vegetables                          | All kinds of vegetables, etc.                                                                 |
| Kimchi                              | All kinds of kimchi, etc.                                                                     |
| Mushrooms                           | All kinds of mushroom, etc.                                                                   |
| Fruits                              | Citrus fruit, strawberry, melon, banana, peach, orange, fruit juices, etc.                    |
| Meats and meat products             | Beef, pork, ham, sausage, meatball, bacon, chicken, turkey, etc.                              |
| Eggs                                | Egg, cooked egg, fried egg, etc.                                                              |
| Fishes and seafood                  | Mackerel, bastard halibut, flat fish, canned tuna, anchovy, squid, etc.                       |
| Seaweeds                            | Seaweed, kelp, etc.                                                                           |
| Milk and dairy products             | Milk, ice cream, yoghurt, cheese, etc.                                                        |
| Oils                                | Olive oil, corn oil, sesame oil, etc.                                                         |
| Beverages and alcohol               | Coffee, green tea, black tea, hot chocolate, carbonated beverage, beer, liquor, whiskey, etc. |
| Seasonings                          | Soy sauce, red pepper, mayonnaise, ketchup, salt, etc.                                        |
| Etc.                                | Etc.                                                                                          |

**Table S2.** Consumption of food groups (g/day or ml/day<sup>s</sup>) by cluster, *n* = 1,687.

| Food Group                              | Male                           |                                |                                | Female                         |                                |                                |
|-----------------------------------------|--------------------------------|--------------------------------|--------------------------------|--------------------------------|--------------------------------|--------------------------------|
|                                         | Cluster 1 ( <i>n</i><br>= 275) | Cluster 2 ( <i>n</i><br>= 141) | Cluster 3 ( <i>n</i><br>= 381) | Cluster 1 ( <i>n</i><br>= 207) | Cluster 2 ( <i>n</i><br>= 276) | Cluster 3 ( <i>n</i><br>= 407) |
| %                                       | 33.7                           | 17.9                           | 48.3                           | 22.6                           | 30.9                           | 46.6                           |
| White rice                              | 29.4                           | 12.7                           | 12.7                           | 39.6                           | 15.8                           | 13.9                           |
| Other grain                             | 3.3                            | 3.3                            | 3.5                            | 3.8                            | 2.8                            | 4.6                            |
| Noodles and dumpling                    | 2.4                            | 2.5                            | 2.8                            | 1.0                            | 1.3                            | 2.6                            |
| Flour and bread                         | 0.8                            | 1.2                            | 1.1                            | 0.8                            | 1.1                            | 1.2                            |
| Pizza, hamburger,<br>cereals and snack  | 0.2                            | 0.3                            | 0.2                            | 0.1                            | 0.2                            | 0.3                            |
| Potatoes                                | 1.8                            | 1.8                            | 3.4                            | 1.8                            | 2.5                            | 4.4                            |
| Sugars and sweets                       | 0.9                            | 0.6                            | 0.8                            | 0.5                            | 0.5                            | 0.6                            |
| Legumes                                 | 4.5                            | 3.0                            | 3.2                            | 3.7                            | 2.6                            | 3.8                            |
| Nuts and seeds                          | 0.5                            | 0.4                            | 0.5                            | 0.4                            | 0.3                            | 0.3                            |
| Vegetables                              | 15.3                           | 12.7                           | 16.4                           | 13.3                           | 11.9                           | 20.4                           |
| Kimchi                                  | 17.0                           | 8.0                            | 7.7                            | 15.9                           | 8.4                            | 7.4                            |
| Mushrooms                               | 0.2                            | 0.2                            | 0.3                            | 0.4                            | 0.2                            | 0.3                            |
| Fruits                                  | 3.5                            | 4.3                            | 20.9                           | 4.2                            | 35.6                           | 8.2                            |
| Meats and meat<br>products              | 5.3                            | 4.3                            | 3.9                            | 2.3                            | 2.8                            | 3.5                            |
| Eggs                                    | 1.2                            | 1.5                            | 1.4                            | 0.7                            | 1.1                            | 1.4                            |
| Fishes and seafood                      | 3.4                            | 5.5                            | 8.3                            | 3.0                            | 3.4                            | 9.7                            |
| Seaweeds                                | 0.7                            | 1.1                            | 3.2                            | 0.5                            | 1.1                            | 3.8                            |
| Milk and dairy<br>products <sup>s</sup> | 2.3                            | 2.3                            | 3.9                            | 2.6                            | 4.1                            | 5.5                            |
| Oils <sup>s</sup>                       | 0.4                            | 0.4                            | 0.4                            | 0.3                            | 0.3                            | 0.4                            |
| Beverages and alcohol <sup>s</sup>      | 4.2                            | 31.4                           | 2.7                            | 2.2                            | 2.4                            | 5.5                            |
| Seasonings <sup>s</sup>                 | 2.3                            | 1.8                            | 1.9                            | 2.5                            | 1.4                            | 2.0                            |
| Etc.                                    | 0.4                            | 0.5                            | 0.8                            | 0.3                            | 0.3                            | 0.3                            |
